# Supplementary material for: Zinc Modulates Endotoxin-Induced Human Macrophage Inflammation through ZIP8 Induction and C/EBPβ Inhibition
Source: PLoS One. 2017 Jan 5;12(1):e0169531. doi: 10.1371/journal.pone.0169531 (PMC5215883; doi:10.1371/journal.pone.0169531)
Supplement: S1 Table — The mRNA expression profile of all ZIPs and ZnTs after ZIP8 knockdown or treatment with a scrambled control followed by LPS (100 ng/mL for 6, 24 or 48 h) exposure reveals that reduction in ZIP8 is the only major change in ZIP expression and reduction of ZnT1 at 24 h after LPS is the only major change in ZnT expression following ZIP8 knockdown as determined by qRT-PCR relative to GAPDH. S1 Table represents cumulative data from 3 different donors (mean values). (XLSX) [file pone.0169531.s002.xlsx]

## Sheet: Sheet1
		mRNA (RCN)
		SC	Anti-ZIP8	SC	Anti-ZIP8	SC	Anti-ZIP8	SC	Anti-ZIP8
	ZIP1	1.486	1.91844	1.60469	2.29071	4.50777	3.60436	4.06334	3.75908
	ZIP2	0.00388124	0.00305002	0.002159	0.00547859	0.00149355	0.00358712	0.00387963	0.00462289
	ZIP3	0.00347204	0.00272259	0.00871474	0.00477313	0.0114361	0.0112797	0.0124037	0.008548
	ZIP4	0.0107353	0.00680646	0.0156942	0.0153292	0.0242469	0.0244281	0.0283253	0.0243896
	ZIP5	0.00912259	0.007642	0.0138786	0.0169995	0.0251017	0.0318685	0.0231638	0.0214424
	ZIP6	0.640304	0.621177	0.773987	0.974192	1.1202	1.02048	1.01206	1.04892
	ZIP7	1.0113	1.14325	0.735353	1.0273	1.26522	1.19493	1.18179	1.50697
	ZIP8	5.1877	1.83998	14.4586	5.67975	48.752	18.7774	40.2847	16.1043
	ZIP9	0.563131	0.489253	0.557307	0.771665	1.00373	0.781108	0.956798	1.05114
	ZIP10	0.667439	0.808267	0.212794	0.371045	0.181156	0.220273	0.261021	0.444323
	ZIP11	0.00132839	0.00319774	0.00598756	0.00469275	0.00557724	0.00171661	0.0111282	0.00727381
	ZIP12	0.00619353	0.00356381	0.00516306	0.0122335	0.0146831	0.010323	0.00959339	0.00996773
	ZIP13	0.127907	0.0604668	0.0658466	0.127621	0.258305	0.243568	0.271242	0.180015
	ZIP14	0.0815197	0.0753259	0.137716	0.18499	0.326947	0.226702	0.355352	0.275699
	ZnT1	1.85583	1.97837	4.12062	4.81003	5.70358	2.99581	4.63183	3.76727
	ZnT2	0.00422094	0.00681487	0.0110134	0.00815338	0.0139457	0.0100939	0.0267532	0.0183594
	ZnT3	0.283064	0.324864	0.0373589	0.0810779	0.0510763	0.0610709	0.324328	0.392632
	ZnT4	0.00251444	0.00398963	0.00324577	0.00291897	0.00630185	0.0040141	0.00471343	0.0113058
	ZnT5	0.998655	1.24524	0.796425	1.01285	1.19735	1.04826	1.48366	1.29297
	ZnT6	0.234769	0.257554	0.272779	0.339617	0.433969	0.412187	0.453437	0.365855
	ZnT7	0.467055	0.659589	1.04156	1.53355	1.44037	1.11985	0.997054	0.881386
	ZnT8	0.00177967	0.00122014	0.00458946	0.00364374	0.00506778	0.00486223	0.00626443	0.00290643
	ZnT9	0.874048	1.09807	0.695541	0.881259	1.12899	1.07027	1.18572	1.19451
	ZnT10	0.0287887	0.0236341	0.0479252	0.0454916	0.0475384	0.0555698	0.0716165	0.0850785
		Resting		6h		24h		48h
		Hours LPS (100 ng/mL)
